# Supplementary material for: Characterizing health state utilities associated with Duchenne muscular dystrophy: a systematic review
Source: Springer Nature journal article supplement (doi:10.1007/s11136-019-02355-x), 2019-12-06
Supplement: MOESM1 [file 17479716]

**Supplementary Table 1: Search strategy**

| <b>MEDLINE</b> | <b>Search term</b>                                                                                                                                                                                                                                   | <b>Results</b>                                                                                             |      |
|----------------|------------------------------------------------------------------------------------------------------------------------------------------------------------------------------------------------------------------------------------------------------|------------------------------------------------------------------------------------------------------------|------|
| Population     | 1 DMD.ti,ab,ot.                                                                                                                                                                                                                                      | 16648                                                                                                      |      |
|                | 2 (duchenne\$ adj3 (syndrome\$ or morbus)).ti,ab,ot,hw.                                                                                                                                                                                              | 142                                                                                                        |      |
|                | 3 ((duchenne\$ or pseudo hypertrophic or pseudohypertrophic) adj3 dystroph\$).ti,ab,ot,hw.                                                                                                                                                           | 28315                                                                                                      |      |
|                | 4 Duchenne muscular dystrophy/                                                                                                                                                                                                                       | 19408                                                                                                      |      |
|                | 5 or/1-4                                                                                                                                                                                                                                             | 32117                                                                                                      |      |
|                | 6 (caregiver or caregiv* or care-giv*).ti,ab,ot,hw.                                                                                                                                                                                                  | 179019                                                                                                     |      |
|                | 7 5 and 6                                                                                                                                                                                                                                            | 259                                                                                                        |      |
|                | 8 (carer or carer* or caring).ti,ab,ot,hw.                                                                                                                                                                                                           | 111680                                                                                                     |      |
|                | 9 5 and 8                                                                                                                                                                                                                                            | 119                                                                                                        |      |
|                | 10 proxy/                                                                                                                                                                                                                                            | 2167                                                                                                       |      |
|                | 11 5 and 10                                                                                                                                                                                                                                          | 5                                                                                                          |      |
|                | 12 (parent or mother or father or son or family).ti,ab,ot,hw.                                                                                                                                                                                        | 2559270                                                                                                    |      |
|                | 13 5 and 12                                                                                                                                                                                                                                          | 2630                                                                                                       |      |
|                | 14 7 or 9 or 11 or 13                                                                                                                                                                                                                                | 2811                                                                                                       |      |
|                | 15 animal/                                                                                                                                                                                                                                           | 7727104                                                                                                    |      |
|                | 16 animal experiment/                                                                                                                                                                                                                                | 2313035                                                                                                    |      |
|                | (rat or rats or mouse or mice or murine or rodent or rodents or hamster or hamsters or pig or pigs or porcine or rabbit or rabbits or animal or animals or dogs or dog or cats or cow or bovine or sheep or ovine or monkey or monkeys).ti,ab,ot,hw. | 13202997                                                                                                   |      |
|                | or/15-17                                                                                                                                                                                                                                             | 13202997                                                                                                   |      |
|                | 19 14 not 18                                                                                                                                                                                                                                         | 2498                                                                                                       |      |
|                | 20 5 not 18                                                                                                                                                                                                                                          | 22414                                                                                                      |      |
| Outcomes       | 21 "Value of Life"/                                                                                                                                                                                                                                  | 129109                                                                                                     |      |
|                | 22 quality of life/                                                                                                                                                                                                                                  | 581879                                                                                                     |      |
|                | 23 quality adjusted life/                                                                                                                                                                                                                            | 0                                                                                                          |      |
|                | 24 quality adjusted life year/                                                                                                                                                                                                                       | 33619                                                                                                      |      |
|                | 25 quality of life index/                                                                                                                                                                                                                            | 2552                                                                                                       |      |
|                | 26 short form 6/ or short form 36/                                                                                                                                                                                                                   | 24512                                                                                                      |      |
|                | 27 sickness impact profile/                                                                                                                                                                                                                          | 9232                                                                                                       |      |
|                | 28 (quality adj2 (wellbeing or well-being)).ti,ab.                                                                                                                                                                                                   | 3948                                                                                                       |      |
|                |                                                                                                                                                                                                                                                      | (quality of wellbeing or quality of well being or index of wellbeing or index of well being or qwb).ti,ab. | 1190 |
|                | 29                                                                                                                                                                                                                                                   | sickness impact profile.ti,ab.                                                                             | 2239 |
|                | 30                                                                                                                                                                                                                                                   | disability adjusted life.ti,ab.                                                                            | 6048 |
|                | 31                                                                                                                                                                                                                                                   |                                                                                                            |      |

|                         |                                                                                                                                                                                                                                                        |         |
|-------------------------|--------------------------------------------------------------------------------------------------------------------------------------------------------------------------------------------------------------------------------------------------------|---------|
|                         | (qal* or qtime* or qwb* or daly* or qtime* or life year or life years).ti,ab.                                                                                                                                                                          | 48476   |
|                         | 32                                                                                                                                                                                                                                                     |         |
|                         | (euroqol* or eq5d* or eq 5d*).ti,ab.                                                                                                                                                                                                                   | 25792   |
|                         | 33                                                                                                                                                                                                                                                     |         |
|                         | (qol* or hql* or hqol* or h qol* or hrqol* or hr qol*).ti,ab.                                                                                                                                                                                          | 129374  |
|                         | 34                                                                                                                                                                                                                                                     |         |
|                         | (pqol or qls).ti,ab.                                                                                                                                                                                                                                   | 937     |
|                         | 35                                                                                                                                                                                                                                                     |         |
|                         | (health utility* or utility score* or disutilit*).ti,ab.                                                                                                                                                                                               | 6418    |
|                         | 36                                                                                                                                                                                                                                                     |         |
|                         | (hui or hui1 or hui2 or hui3).ti,ab.                                                                                                                                                                                                                   | 3329    |
|                         | 37                                                                                                                                                                                                                                                     |         |
|                         | health* year* equivalent*.ti,ab.                                                                                                                                                                                                                       | 80      |
|                         | 38                                                                                                                                                                                                                                                     |         |
|                         | (health* adj2 year* adj2 equivalent*).ti,ab.                                                                                                                                                                                                           | 99      |
|                         | 39                                                                                                                                                                                                                                                     |         |
|                         | (health adj3 (utilit* or status)).ti,ab.                                                                                                                                                                                                               | 145359  |
|                         | 40                                                                                                                                                                                                                                                     |         |
|                         | (utilit* adj3 (valu* or measur* or health or life or estimat* or elicit* or disease or score* or weight)).ti,ab.                                                                                                                                       | 27486   |
|                         | 41                                                                                                                                                                                                                                                     |         |
|                         | (preference* adj3 (valu* or measur* or health or life or estimat* or elicit* or disease or score* or instrument or instruments)).ti,ab.                                                                                                                | 21552   |
|                         | 42                                                                                                                                                                                                                                                     |         |
|                         | rosser.ti,ab.                                                                                                                                                                                                                                          | 200     |
|                         | 43                                                                                                                                                                                                                                                     |         |
|                         | (hye or hyes).ti,ab.                                                                                                                                                                                                                                   | 183     |
|                         | 44                                                                                                                                                                                                                                                     |         |
|                         | (willingness to pay or time tradeoff or time trade off or tto or standard gamble*).ti,ab.                                                                                                                                                              | 16748   |
|                         | 45                                                                                                                                                                                                                                                     |         |
|                         | (sf36 or sf 36 or short form 36 or shortform 36 or short form36 or shortform36 or sf thirtysix or sfthirtysix or sfthirty six or sf thirty six or shortform thirtysix or shortform thirty six or short form thirtysix or short form thirty six).ti,ab. | 60639   |
|                         | 46                                                                                                                                                                                                                                                     |         |
|                         | (sf6 or sf 6 or short form 6 or shortform 6 or sf six or sfsix or shortform six or short form six or shortform6 or short form6).ti,ab.                                                                                                                 | 4005    |
|                         | 47                                                                                                                                                                                                                                                     |         |
|                         | (sf6D or sf 6D or short form 6D or shortform 6D or sf sixD or sfsixD or shortform sixD or short form sixD or shortform6D or short form6D).ti,ab.                                                                                                       | 2097    |
|                         | 48                                                                                                                                                                                                                                                     |         |
|                         | nottingham health profile*.ti,ab.                                                                                                                                                                                                                      | 2594    |
|                         | 49                                                                                                                                                                                                                                                     |         |
|                         | sickness impact profile.ti,ab.                                                                                                                                                                                                                         | 2239    |
|                         | 50                                                                                                                                                                                                                                                     |         |
|                         | exp health status indicators/                                                                                                                                                                                                                          | 303835  |
|                         | 51                                                                                                                                                                                                                                                     |         |
|                         | duke health profile.ti,ab.                                                                                                                                                                                                                             | 193     |
|                         | 52                                                                                                                                                                                                                                                     |         |
|                         | functional status questionnaire.ti,ab.                                                                                                                                                                                                                 | 277     |
|                         | 53                                                                                                                                                                                                                                                     |         |
|                         | dartmouth coop functional health assessment*.ti,ab.                                                                                                                                                                                                    | 23      |
|                         | 54                                                                                                                                                                                                                                                     |         |
|                         | or/21-54                                                                                                                                                                                                                                               | 1216892 |
|                         | 55                                                                                                                                                                                                                                                     |         |
| DMD carers and outcomes | 56 19 and 55                                                                                                                                                                                                                                           | 277     |
| DMD and outcomes        | 57 20 and 55                                                                                                                                                                                                                                           | 1042    |
| <b>EMBASE</b>           |                                                                                                                                                                                                                                                        |         |
| Population              | 58 56 use oomezd                                                                                                                                                                                                                                       | 191     |
|                         | 59 57 use oomezd                                                                                                                                                                                                                                       | 698     |

|    |                                                                                                                  |          |
|----|------------------------------------------------------------------------------------------------------------------|----------|
| 60 | DMD.ti,ab,ot.                                                                                                    | 16648    |
| 61 | (duchenne\$ adj3 (syndrome\$ or morbus)).ti,ab,ot,hw.                                                            | 142      |
| 62 | ((duchenne\$ or pseudo hypertrophic or pseudohypertrophic) adj3 dystroph\$).ti,ab,ot,hw.                         | 28315    |
| 63 | Muscular Dystrophy, Duchenne/                                                                                    | 12810    |
| 64 | or/60-63                                                                                                         | 32117    |
| 65 | (caregiver or caregiv* or care-giv*).ti,ab,or,hw.                                                                | 179017   |
| 66 | 64 and 65                                                                                                        | 259      |
| 67 | (carer or carer* or caring).ti,ab,ot,hw.                                                                         | 111680   |
| 68 | 64 and 67                                                                                                        | 119      |
| 69 | proxy/                                                                                                           | 2167     |
| 70 | 64 and 69                                                                                                        | 5        |
| 71 | (parent or mother or father or son or family).ti,ab,ot,hw.                                                       | 2559270  |
| 72 | 64 and 71                                                                                                        | 2630     |
| 73 | 66 or 68 or 70 or 72                                                                                             | 2811     |
| 74 | exp animals/ not (exp animals/ and humans/)                                                                      | 16132559 |
| 75 | 73 not 74                                                                                                        | 2057     |
| 76 | 64 not 74                                                                                                        | 20830    |
| 77 | "Value of Life"/                                                                                                 | 129109   |
| 78 | quality of life/                                                                                                 | 581879   |
| 79 | quality adjusted life/                                                                                           | 0        |
| 80 | quality-adjusted life years/                                                                                     | 33619    |
| 81 | sickness impact profile/                                                                                         | 9232     |
| 82 | (quality adj2 (wellbeing or well-being)).ti,ab.                                                                  | 3948     |
| 83 | (quality of wellbeing or quality of well being or index of wellbeing or index of well being or qwb).ti,ab.       | 1190     |
| 84 | sickness impact profile.ti,ab.                                                                                   | 2239     |
| 85 | disability adjusted life.ti,ab.                                                                                  | 6048     |
| 86 | (qal* or qtime* or qwb* or daly*).ti,ab.                                                                         | 33298    |
| 87 | (euroqol* or eq5d* or eq 5d*).ti,ab.                                                                             | 25792    |
| 88 | (qol* or hql* or hqol* or h qol* or hrqol* or hr qol*).ti,ab.                                                    | 129374   |
| 89 | (pqol or qls).ti,ab.                                                                                             | 937      |
| 90 | (health utility* or utility score* or disutilit*).ti,ab.                                                         | 6418     |
| 91 | (hui or hui1 or hui2 or hui3).ti,ab.                                                                             | 3329     |
| 92 | health* year* equivalent*.ti,ab.                                                                                 | 80       |
| 93 | (health* adj2 year* adj2 equivalent*).ti,ab.                                                                     | 99       |
| 94 | (health adj3 (utilit* or status)).ti,ab.                                                                         | 145359   |
| 95 | (utilit* adj3 (valu* or measur* or health or life or estimat* or elicit* or disease or score* or weight)).ti,ab. | 27486    |

Outcomes

|                                    |            |                                                                                                                                                                                                                                                       |            |
|------------------------------------|------------|-------------------------------------------------------------------------------------------------------------------------------------------------------------------------------------------------------------------------------------------------------|------------|
|                                    |            | (preference* adj3 (valu* or measur* or health or life or estimat* or elicit* or disease or score* or instrument or instruments)).ti,ab.                                                                                                               | 21552      |
|                                    | 96         |                                                                                                                                                                                                                                                       |            |
|                                    | 97         | rosser.ti,ab.                                                                                                                                                                                                                                         | 200        |
|                                    | 98         | (hye or hyes).ti,ab.                                                                                                                                                                                                                                  | 183        |
|                                    |            | (willingness to pay or time tradeoff or time trade off or tto or standard gamble*).ti,ab.                                                                                                                                                             | 16748      |
|                                    | 99         |                                                                                                                                                                                                                                                       |            |
|                                    | 100        | (sf36 or sf 36 or short form 36 or shortform 36 or short form36 or shortform36 or sf thirtysix or sftirtysix or sfthirty six or sf thirty six or shortform thirtysix or shortform thirty six or short form thirtysix or short form thirty six).ti,ab. | 60639      |
|                                    | 101        | (sf6 or sf 6 or short form 6 or shortform 6 or sf six or sfsix or shortform six or short form six or shortform6 or short form6).ti,ab.                                                                                                                | 4005       |
|                                    | 102        | (sf6D or sf 6D or short form 6D or shortform 6D or sf sixD or sfsixD or shortform sixD or short form sixD or shortform6D or short form6D).ti,ab.                                                                                                      | 2097       |
|                                    | 103        | nottingham health profile*.ti,ab.                                                                                                                                                                                                                     | 2594       |
|                                    | 104        | sickness impact profile.ti,ab.                                                                                                                                                                                                                        | 2239       |
|                                    | 105        | exp health status indicators/                                                                                                                                                                                                                         | 303835     |
|                                    | 106        | duke health profile.ti,ab.                                                                                                                                                                                                                            | 193        |
|                                    | 107        | functional status questionnaire.ti,ab.                                                                                                                                                                                                                | 277        |
|                                    | 108        | dartmouth coop functional health assessment*.ti,ab.                                                                                                                                                                                                   | 23         |
|                                    | 109        | or/77-108                                                                                                                                                                                                                                             | 1207845    |
| DMD carers and outcomes            | 110        | 75 and 109                                                                                                                                                                                                                                            | 167        |
| DMD and outcomes                   | 111        | 76 and 109                                                                                                                                                                                                                                            | 699        |
| MEDLINE                            | 112        | 110 use ppezv                                                                                                                                                                                                                                         | 87         |
| MEDLINE                            | 113        | 111 use ppezv                                                                                                                                                                                                                                         | 356        |
|                                    | 114        | 112 or 56                                                                                                                                                                                                                                             | 279        |
|                                    | 115        | 113 or 57                                                                                                                                                                                                                                             | 1056       |
| <b>(DMD + CG terms) + OUTCOMES</b> | <b>116</b> | <b>remove duplicates from 114</b>                                                                                                                                                                                                                     | <b>222</b> |
| <b>All DMD terms + OUTCOMES</b>    | <b>117</b> | <b>remove duplicates from 115</b>                                                                                                                                                                                                                     | <b>888</b> |

## Supplementary Table 2: Study quality assessment

Within the study quality assessment, one point was awarded for each of the following criteria: (1) sample size  $\geq 100$ ; (2) description of respondent selection and recruitment; (3) description of inclusion/exclusion criteria; (4) response rate  $\geq 60\%$ ; (5) reporting of attrition/loss to follow-up (for longitudinal studies only); (6) reporting of missingness of data and approaches to deal with it; (7) appropriateness of measure (based on the authors' judgment). Lastly, the scores were summed for each article to yield an overall quality score, ranging from 0 to 7 (for longitudinal studies) or 0 to 6 (for cross-sectional studies) where higher scores indicated higher quality.[26]

| Citation                                           | n | Recruitment | IC/EC | Response | LFU | Missing data | Measure | Total Score |
|----------------------------------------------------|---|-------------|-------|----------|-----|--------------|---------|-------------|
| Cavazza et al, 2016 [29]                           | 1 | 1           | 1     | 0        | C   | 1            | 1       | 5/6         |
| Landfeldt et al, 2014, 2015, 2016 [15; 17; 27; 28] | 1 | 1           | 1     | 0        | C   | 1            | 1       | 5/6         |
| Landfeldt et al, 2018 [30]                         | 1 | 1           | 1     | 0        | C   | 0            | 1       | 4/6         |
| Pangalila et al, 2011 [32]                         | 1 | 1           | 1     | 0        | C   | 1            | 1       | 5/6         |

C = Cross-sectional study, criterion not applicable

n=Appropriate sample size; Recruitment= Appropriate and robust respondent recruitment strategy; IC/EC=Inclusion/exclusion criteria clearly specified; Response=Response rates reported; LFU=Loss to follow-up reported; Missing data=Amount and nature of missing data described; Measure=Measure appropriateness

The quality of the utilities included in Magnetta et al.,[31] could not be rated due to that only few details were reported.

**Supplementary Table 3: Utilities for DMD patients with heart failure [31]**

|                | Mean utility |
|----------------|--------------|
| NYHA class I   | 0.7          |
| NYHA class II  | 0.63         |
| NYHA class III | 0.55         |
| NYHA class IV  | 0.44         |

NYHA: New York Heart Association

**Supplementary Table 4: Stratified utility values for (top) DMD patients; and (bottom) DMD caregivers [27; 28]**

| Health state                                          | n   | Mean HUI-3 utility |
|-------------------------------------------------------|-----|--------------------|
| <b><i>Caregiver-rated patient physical health</i></b> |     |                    |
| Excellent                                             | 145 | 0.62               |
| Very good                                             | 321 | 0.5                |
| Good                                                  | 228 | 0.37               |
| Fair                                                  | 70  | 0.22               |
| Poor                                                  | 6   | 0                  |
| <b><i>Caregiver-rated patient mental health</i></b>   |     |                    |
| Happy/interested                                      | 455 | 0.56               |
| Somewhat happy                                        | 239 | 0.36               |
| Somewhat unhappy                                      | 63  | 0.22               |
| Very unhappy                                          | 13  | 0.04               |

| Health state                                          | n   | Mean EQ-5D utility |
|-------------------------------------------------------|-----|--------------------|
| <b><i>Caregiver-rated patient physical health</i></b> |     |                    |
| Excellent                                             | 145 | 0.88 (0.15)        |
| Very good                                             | 321 | 0.83               |
| Good                                                  | 228 | 0.77               |
| Fair/poor                                             | 76  | 0.71               |
| <b><i>Caregiver-rated patient mental health</i></b>   |     |                    |
| Happy/interested                                      | 455 | 0.84               |
| Somewhat happy                                        | 239 | 0.79               |
| Somewhat unhappy                                      | 63  | 0.69               |
| Very unhappy                                          | 13  | 0.57 (0.32)        |

DMD: Duchenne muscular dystrophy; HUI: Health Utilities Index
